# Supplementary material for: Understanding Dirac, Weyl and nodal-line semimetals: a step-by-step guide through model Hamiltonians
Source: Royal Society of Chemistry journal article supplement (doi:10.1039/d5cp04170h), 2026-01-01
Supplement: d5cp04170h1.pdf [file d5cp04170h1.pdf]

# Understanding Dirac, Weyl and Nodal-Line Semimetals: A Step-by-Step Guide through Model Hamiltonians

Debnarayan Jana<sup>\*a</sup>, Deep Mondal<sup>b</sup>

## Exercises

### 1. Spinful, valley-resolved low-energy graphene Hamiltonian (Section III).

Work with the spinful, valley-resolved low-energy graphene Hamiltonian as shown in Section III. Briefly justify each entry (e.g. action of  $T = is_y K$  and inversion exchanging  $A/B$ ).

(a) **Gap analysis at  $K/K'$ .** Show analytically that:

- **With Rashba only** ( $\lambda_R \neq 0$ ,  $M = \lambda_{SO} = J_{ex} = 0$ ), the Dirac points at  $K/K'$  remain gapless. In fact, at  $\mathbf{k} = 0$  one finds the spectrum

$$\{0, 0, \pm 2\lambda_R\},$$

so two bands remain pinned at zero energy.

- A **Semenoff mass**  $M$  opens a trivial gap  $E_g = 2|M|$  at each valley.
- **Intrinsic SOC**  $\lambda_{SO}$  opens a Kane–Mele (QSHE) gap  $E_g = 2|\lambda_{SO}|$  at each valley (with opposite spin masses).

(b) **QAH from exchange + Rashba (mechanism sketch).** For  $J_{ex} \neq 0$  and  $\lambda_R \neq 0$  (with  $M = \lambda_{SO} = 0$ ), explain qualitatively (or by exhibiting a lattice regularization) how a Chern gap can emerge even though each term alone is gapless: spin splitting ( $J_{ex}$ ) plus spin–momentum locking ( $\lambda_R$ ) generates a momentum–dependent mass whose sign pattern yields a nonzero Chern number once a global gap opens.

(c) **Numerical illustration (figures with inset).** Compute and plot the pair of surfaces  $\pm E(k_x, k_y)$  near a valley for three parameter sets:

- Gapless Rashba: ( $\lambda_R > 0$ ,  $M = \lambda_{SO} = J_{ex} = 0$ );
- Trivial Semenoff gap: ( $M > 0$ ,  $\lambda_R = \lambda_{SO} = J_{ex} = 0$ );
- Intrinsic SOC gap: ( $\lambda_{SO} > 0$ ,  $\lambda_R = M = J_{ex} = 0$ ).

Scale energies to eV and add a 0–1 eV inset to each panel (zoom of the conduction branches). **Deliverable:** three figures (both conduction and valence surfaces together), consistent color scales and viewing angles, each with a 0–1 eV inset.

<sup>0a</sup> Department of Physics, University of Calcutta, 92 Acharya Prafulla Chandra Road, Kolkata 700009, India.  
E-mail: djphy@caluniv.ac.in

<sup>0b</sup> Department of Physics, Indian Institute of Technology Bombay, Mumbai 400076, India

(d) **Edge physics expectation.**

$$\begin{aligned} M\text{-gap} &\Rightarrow \text{no net Hall effect (valley Hall only),} \\ \lambda_{SO}\text{-gap} &\Rightarrow \text{helical edges (QSHE),} \\ J_{ex} + \lambda_R &\Rightarrow \text{chiral edge(s) (QAH).} \end{aligned}$$

**Hint.** At  $\mathbf{k} = 0$  with Rashba only, the eigenvalues are  $\{0, 0, \pm 2\lambda_R\}$ ; two bands remain at zero, hence no full gap, whereas  $M$  or  $\lambda_{SO}$  produce masses  $\pm M$  or  $\pm \lambda_{SO}$  at each valley, giving gaps  $2|M|$  and  $2|\lambda_{SO}|$ , respectively. Readers may consult useful references [1, 2, 3, 4, 5].

2. **Continuum nodal-loop model (units  $\hbar = 1$ ).** Consider a continuum two-band Hamiltonian

$$H(\mathbf{k}) = v_x k_x \sigma_x + m(k_y, k_z) \sigma_z, \quad m(k_y, k_z) = b - \sqrt{v_y^2 k_y^2 + v_z^2 k_z^2}, \quad (1)$$

with  $v_{x,y,z}, b > 0$  and Pauli matrices  $\sigma_{x,z}$  acting in an orbital (sublattice) space. The conduction/valence energies are

$$E_{\pm} = \pm \sqrt{v_x^2 k_x^2 + m^2}.$$

The nodal loop lies in the  $(k_y, k_z)$  plane at  $k_x = 0$  and solves  $m(k_y, k_z) = 0$ , i.e.

$$v_y^2 k_y^2 + v_z^2 k_z^2 = b^2, \quad (2)$$

an ellipse with semi-axes  $a = b/v_y$  and  $c = b/v_z$ . Note that on the plane  $k_x = 0$  the Hamiltonian anticommutes with  $\Gamma = \sigma_y$ , i.e.  $\{H(0, k_y, k_z), \Gamma\} = 0$  (a chiral symmetry).

- (a) **Berry (Zak) phase as a diagnostic of the drumhead region.** For each fixed  $(k_y, k_z)$ , view  $H$  as a 1D insulator in  $k_x$  with “mass”  $m(k_y, k_z)$ . Define the Zak phase of the occupied band along  $k_x$ :

$$\phi_{\text{Zak}}(k_y, k_z) := \int_{-\infty}^{+\infty} A_x(\mathbf{k}) dk_x, \quad (3)$$

and show

$$\phi_{\text{Zak}}(k_y, k_z) = \begin{cases} \pi, & v_y^2 k_y^2 + v_z^2 k_z^2 < b^2, \\ 0, & \text{otherwise.} \end{cases} \quad (4)$$

**Hint.** In 1D chiral Dirac, the Zak phase is  $\pi$  when  $m < 0$  and 0 when  $m > 0$  (mod  $2\pi$ ).

- (b) **Berry phase on linking loops in  $(k_y, k_z)$ .** Restrict to  $k_x = 0$  and take a small closed path  $C$  in the  $(k_y, k_z)$  plane. Show that the occupied-band Berry phase is

$$\gamma(C) = \oint_C \mathbf{A}_{\parallel} \cdot d\mathbf{k}_{\parallel} = \begin{cases} \pi, & C \text{ links the nodal ellipse once,} \\ 0, & \text{it does not link.} \end{cases} \quad (5)$$

**Deliverable.** Put  $H(0, k_y, k_z)$  in an off-diagonal chiral form by a unitary rotation (e.g.  $\sigma_z \rightarrow \sigma_x$ ), write

$$H = \begin{pmatrix} 0 & q \\ q^* & 0 \end{pmatrix}, \quad q \propto m(k_y, k_z),$$

and show  $\gamma = \frac{1}{2} \Delta \arg q$  along  $C$ . **Hint.** A loop that winds once around a simple zero of  $q$  picks up  $\Delta \arg q = 2\pi$ .

- (c) **Integer winding along  $k_x$  (1D invariant parameterized by  $(k_y, k_z)$ ).** Show that with chiral symmetry  $\Gamma\sigma_x\Gamma^{-1} = -\sigma_x$  and  $\Gamma\sigma_z\Gamma^{-1} = -\sigma_z$ , the 1D Hamiltonian at fixed  $(k_y, k_z)$  has a winding number

$$\nu(k_y, k_z) = \frac{1}{2\pi i} \int dk_x \partial_{k_x} \ln(d_x(k_x) - i m), \quad d_x = v_x k_x, \quad (6)$$

and evaluate

$$\nu = \frac{1}{2} \left( \text{sgn}(m(-\infty)) - \text{sgn}(m(+\infty)) \right) = \frac{1}{2}(1 - 1) = 0$$

unless you compactify  $k_x$  to a lattice Brillouin zone; then

$$\nu(k_y, k_z) = \begin{cases} 1, & v_y^2 k_y^2 + v_z^2 k_z^2 < b^2, \\ 0, & \text{otherwise.} \end{cases} \quad (7)$$

**Hint.** On a lattice,  $d_x(k_x)$  winds once around the origin as  $k_x$  goes through the BZ; the sign of  $m$  decides if the loop encloses the origin.

- (d) **Drumhead surface states via a mass domain wall.** Consider a slab open in  $x$  and translationally invariant in  $y, z$ . Treat  $k_y, k_z$  as parameters and replace  $k_x \rightarrow -i\partial_x$ . Show that when  $m(k_y, k_z)$  changes sign across the surface (interior vs vacuum), there exists a normalizable zero mode localized at the surface iff  $v_y^2 k_y^2 + v_z^2 k_z^2 < b^2$ . Conclude that surface “drumhead” states fill the interior of the ellipse’s projection. **Hint.** Solve  $(-iv_x \partial_x \sigma_x + m(x) \sigma_z) \psi = 0$  with  $m(x)$  kink; try  $\psi(x) \propto \exp[-\int^x m(x')/v_x dx']$ .
- (e) **Low-energy DOS (one-line scaling and prefactor).** Using tubular coordinates along the ellipse, argue that

$$\rho(E) = \frac{L_{\text{ellipse}}}{2\pi^2 v_x v_n} E + \mathcal{O}(E^3), \quad (8)$$

where  $L_{\text{ellipse}}$  is the ellipse circumference and  $v_n$  is the loop-average of the normal velocity  $v_n = \|\nabla_{(k_y, k_z)} m\|$  on the nodal set. Check the circular limit  $v_y = v_z \equiv v_{\perp}$  gives

$$\rho(E) = \frac{b}{\pi v_x v_{\perp}^2} E.$$

**Hint.** Integrate the 2D Dirac DOS density  $E/(2\pi v_x v_n)$  along the nodal line. Readers may consult [6, 7, 8, 9].

## References

- [1] C. Kane and E. Mele, *Physical Review Letters* **95**, 226801 (2005).
- [2] H. Min, J. Hill, N. A. Sinitsyn, B. Sahu, L. Kleinman, and A. H. MacDonald, *Physical Review B* **74**, 165310 (2006).
- [3] A. Bandyopadhyay and D. Jana, *Universal Journal of Materials Science* **8**, 32–44 (2020).
- [4] L. W. Molenkamp, G. Schmidt, and G. E. W. Bauer, *Physical Review B* **64**, 121202 (2001).

- [5] G. Bihlmayer, P. Noël, D. V. Vyalikh, E. V. Chulkov, and A. Manchon, *Nature Reviews Physics* **4**, 642–659 (2022).
- [6] D. Vanderbilt, *Berry Phases in Electronic Structure Theory: Electric Polarization, Orbital Magnetization and Topological Insulators*, Cambridge University Press (2018).
- [7] D. Mondal, A. Bandyopadhyay, A. Nandy, and D. Jana, *Applied Materials Today* **40**, 102360 (2024).
- [8] D. Mondal, A. Bandyopadhyay, and D. Jana, *International Journal of Theoretical Physics* **64**, 1–34 (2025).
- [9] Y. H. Chan, C.-K. Chiu, M.-J. Chou, and A. P. Schnyder, *Physical Review B* **93**, 205132 (2016).
